# Supplementary material
Source: MDPI journal article supplement (https://www.mdpi.com/2071-1050/16/9/3626)
Supplement: s1 [file s1]

## Supplementary Materials - Questionnaire

### GENERAL

What challenges are there, in your opinion, to implementing a Decentralized Composting (DC) project?

1. \_\_\_\_\_
2. \_\_\_\_\_
3. \_\_\_\_\_
4. \_\_\_\_\_

How would/did you deal with the above-noted challenges?

1. \_\_\_\_\_
2. \_\_\_\_\_
3. \_\_\_\_\_
4. \_\_\_\_\_

### EXAMPLES OF CHALLENGES

Please indicate how you dealt or would deal with each one of the challenges noted below!

#### ***Not in My Backyard (NIMBY)***

Continuous research? Initial pilot trials? Readings previous research and studies? Other (explain)?

#### ***Quality of input material***

Awareness campaigns? Participant training? Continuous quality control? Other (explain)?

#### ***Odour management***

Assurance of proper compost mix? Fan installed? Moisture content control? Other (explain)?

#### ***Pest and rodent management***

Completely sealed composting system? Anti-rodent external coating? Other (explain)?

#### ***Seasonal fluctuations***

Isolation of the composter? Keep constant temperature inside the composter? Other (explain)?

#### ***Availability of bulking material***

Is the materials available through the municipality from tree pruning and cutting? Other (explain)?

#### ***Storage area for excess feedstock and compost***

Is there available area for compost maturation? For excess feedstock?

#### ***Availability of energy and water for the process***

Through the municipality? Other (explain)?

---

***Distance to households***

Where the organic waste bins located near the municipality's waste bins? Near houses? Other (explain)?

---

***Existing regulatory tools (laws, regulations, bylaws)***

Are there regulatory tools that can help the DC implementation?

---

Are there awards for composted organic waste from the municipality?

---

Is there a Pay as You Throw (PAYT) waste policy?

---

Are there existing regulations that obligate people to participate in organic wastes separation?

---

Other (explain)?

---

***Hindrances or limitations to DC implementation***

Are there hindrances or limitations to DC implementation?

---

Bureaucracy level for planning community composting?

---

Other (explain)?

---

**ADDITIONAL COMMENTS**

---

---

---

---

---

---
